# Supplementary material for: Transplanting gravid lizards to high elevation alters maternal and embryonic oxygen physiology, but not reproductive success or hatchling phenotype
Source: Oxford University Press journal article supplement (doi:10.1242/jeb.206839), 2019-01-01
Supplement: jeb206839supp.pdf [file jeb206839supp.pdf]

**Table S1. Descriptive details of sampled *Podarcis muralis* populations.**

| <b>Name</b>                  | <b>Latitude<br/>Longitude</b> | <b>Altitude<br/>(m ASL)</b> | <b>Habitat Type</b>                        | <b><i>N</i> Low-elevation<br/><i>N</i> High-elevation</b> | <b>Sampling<br/>Dates</b> |
|------------------------------|-------------------------------|-----------------------------|--------------------------------------------|-----------------------------------------------------------|---------------------------|
| <b>Alas<sup>1</sup></b>      | 42°56'58"N<br>001°2'47"E      | 472                         | Cemetery and<br>rock wall                  | 5                                                         | 10 Apr. 2018              |
|                              |                               |                             |                                            | 5                                                         | 17 Apr. 2018              |
| <b>Luzenac<sup>1,2</sup></b> | 42°57'22"N<br>001°5'1"E       | 443                         | Cemetery and<br>rock wall                  | 4                                                         | 3-4 Apr. 2018             |
|                              |                               |                             |                                            | 5                                                         | 17 Apr. 2018              |
| <b>Mercenac</b>              | 42°57'52"N<br>001°6'10"E      | 382                         | Cemetery                                   | 5                                                         | 21 Apr. 2018              |
|                              |                               |                             |                                            | 6                                                         | 18 Apr. 2018              |
| <b>La Mongie</b>             | 42°54'32"N<br>0°10'7" E       | 1795                        | Natural rock<br>outcrops and<br>rock walls | 0                                                         | -                         |
|                              |                               |                             |                                            | 8                                                         | 1-6 May 2018              |
| <b>Col de la<br/>Core</b>    | 42°51'34.4"N<br>1°6'18.2"E    | 1402                        | Natural rock<br>outcrop                    | 0                                                         | -                         |
|                              |                               |                             |                                            | 9                                                         | 26 May 2018               |

<sup>1</sup>Population also studied in Calsbeek *et al.* (2010) *J Evol Biol* 23:1138-47.

<sup>2</sup>Population also studied in Gangloff *et al.* (2019) *Physiol Biochem Zool* 92:189–200.
